# Supplementary material for: Selective in situ functionalization of biosensors on LOC devices using laminar co-flow
Source: Royal Society of Chemistry journal article supplement (doi:10.1039/c2lc40107j), 2012-01-01
Supplement: c2lc40107j.pdf [file c2lc40107j.pdf]

## Electronic Supplementary Information

The fluid dynamics of the LOC was characterized by changing the ratio between the two inlet flows. Figure 1 shows the characterization. The main solution was fixed while the lateral flow was increased. When using a smaller flow rate, the behavior of the fluid seems less steady than with bigger flow rate. However this particular behavior does not lead to bubble formation.

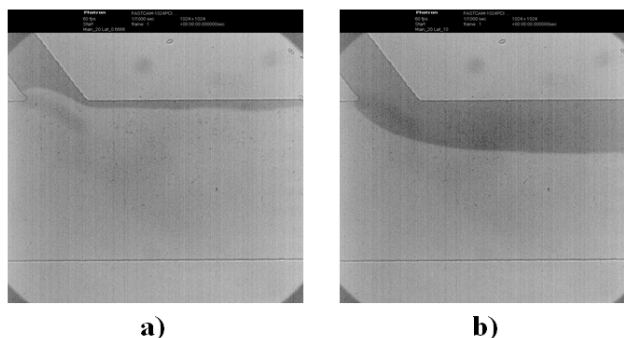

**Fig. 1** Microscopic images of the fluid dynamics, main flow at 20  $\mu\text{l}/\text{min}$ . a) Lateral flow at 0.666  $\mu\text{l}/\text{min}$  resulting in a desired focalization of 56  $\mu\text{m}$ , b) Lateral flow at 10  $\mu\text{l}/\text{min}$  focalization of 334  $\mu\text{m}$ .

After acquiring the images, the focalization of the fluid was measured. The practical results obtained from the microscopic images (Fig.1) were compared with theoretical data. The calculations were done with equations (1) and (2). Figure 2 represents the comparison between experimental information and calculations.

$$\frac{w_0}{w} = \frac{1}{g(\lambda)} \frac{Q_l}{Q_i + Q_f} \quad (1)$$

$$g(\lambda) = (1 + \lambda^2)(1 - 1.3553\lambda + 1.9467\lambda^2 - 1.7012\lambda^3 + 0.9564\lambda^4 - 0.2537\lambda^5); \lambda < 1 \quad (2)$$

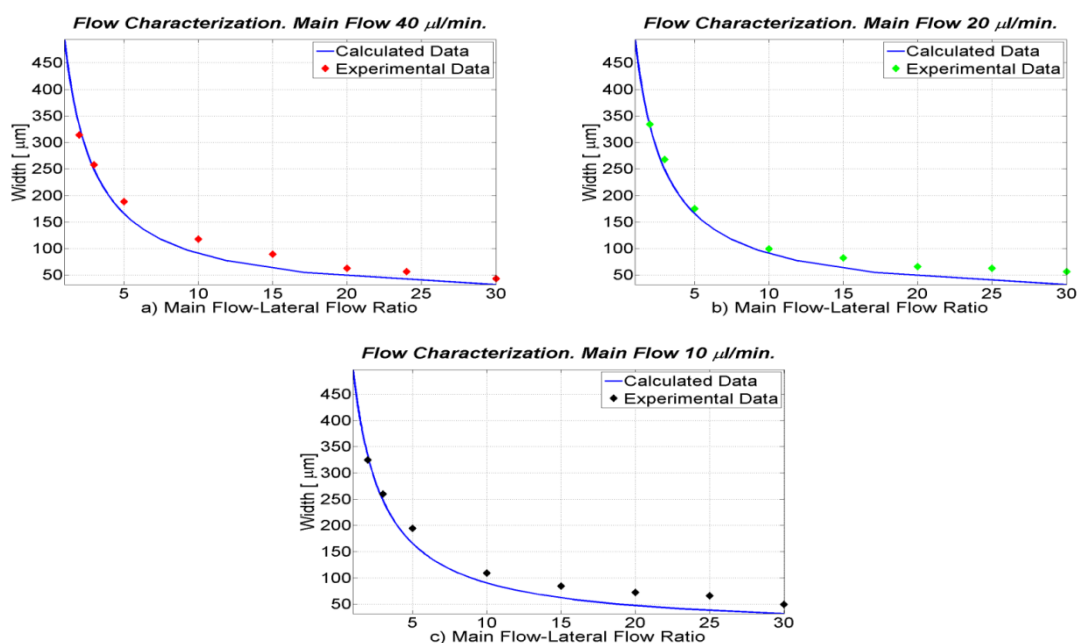

**Fig.2** Validation of the experimental data with theoretical results. a) Main flow at 40  $\mu\text{l}/\text{min}$ , b) Main flow at 20  $\mu\text{l}/\text{min}$ , c) Main flow at 10  $\mu\text{l}/\text{min}$ .

With the lateral co-flow there is no risk of bubble formation, since fluids are injected through a well closed syringe.
